# Supplementary material for: Gladiolin produced by pathogenic Burkholderia synergizes with amphotericin B through membrane lipid rearrangements
Source: PubMed Central journal article supplement (PMC11559049; doi:10.1128/mbio.02611-24), 2024-10-18
Supplement: mbio.02611-24-s0003.pdf [file mbio.02611-24-s0003.pdf]

## SUPPLEMENTAL DATA LEGENDS

### Supplemental Results and Methods

Detailed information about the NMR procedure and results are available in the Supplementary data file.

#### Movie S1

AFM time course of POPC:ergosterol model lipids with ratios of 80%:20% under control conditions.

#### Movie S2

AFM time course of POPC:ergosterol model lipids with ratios of 80%:20% with 20 µg/ml gladiolin.

#### Movie S3

AFM time course of POPC:ergosterol model lipids with ratios of 80%:20% with 20 µg/ml AmpB.

#### Movie S4

AFM time course of POPC:ergosterol model lipids with ratios of 80%:20% with 10 µg/ml gladiolin and 10 µg/ml AmpB in combination.

#### Movie S5

AFM time course of POPC:ergosterol model lipids with ratios of 80%:20% with 20 µg/ml natamycin.

#### Movie S6

AFM time course of POPC:ergosterol model lipids with ratios of 80%:20% with 10 µg/ml gladiolin and 10 µg/ml natamycin in combination.

#### Table S1

FICIs of gladiolin/AmpB combination for the *C. albicans* clinical isolates tested in Figure S2.

#### Table S2

Fungal strains used in the study.

#### Dataset S1

Numerical data used to make the figures.
